# Supplementary material
Source: Springer Nature journal article supplement (https://www.springermedizin.de/resource/supplementary/13601_2014_1064_MOESM1_ESM.pdf/9678620)
Supplement: MOESM1 [file 9678620]

141 Participants

```
graph TD; A[141 Participants] --> B[123 completed food diaries]; B --> C[Excluded: <br/>• Breastfeeding mothers' diaries: 4 <br/>• >2 breast feeds per food diary: 4 <br/>• Inaccurate/unknown portion sizes: 4 <br/>• Too few days recorded: 1 <br/>• Not on a cow's milk elimination diet: 5]; C --> D[105 diaries included in data analysis];
```

123 completed food diaries

**Excluded:**

- Breastfeeding mothers' diaries: 4
- >2 breast feeds per food diary: 4
- Inaccurate/unknown portion sizes: 4
- Too few days recorded: 1
- Not on a cow's milk elimination diet: 5

105 diaries included in data analysis
